# Supplementary material for: Liquid phase microextraction based on the solidification of a floating ionic liquid combined with high-performance liquid chromatography for the preconcentration of phthalate esters in environmental waters and in bottled beverages
Source: Royal Society of Chemistry journal article supplement (doi:10.1039/c6ra00788k), 2016-01-01
Supplement: c6ra00788k1.pdf [file c6ra00788k1.pdf]

## **Electronic Supplementary Information**

**Liquid phase microextraction based on the solidification of floating ionic liquid combined with high-performance liquid chromatography for the preconcentration of phthalate esters in bottled beverages and environmental waters**

Lu Hu, Wanyu Shan, Ying Zhang, Songqing Li, Haixiang Gao, Wenfeng Zhou \*

Department of Applied Chemistry, China Agricultural University, Yuanmingyuan West Road 2#,  
Haidian District, Beijing 100194, China

\* Corresponding author, tel:+86-010-62730244

E-mail addresses: zhouwenfeng@cau.edu.cn (W. Zhou)

Table S1: Spiked recoveries (%) of one juice and two herb tea samples (n=3).

| Analytes | Spiked<br>level<br>( $\mu\text{g/L}$ ) | intra-day   |     |            |     |            |     | inter-day   |     |            |     |            |     |
|----------|----------------------------------------|-------------|-----|------------|-----|------------|-----|-------------|-----|------------|-----|------------|-----|
|          |                                        | grape juice |     | herb tea 1 |     | herb tea 2 |     | grape juice |     | herb tea 1 |     | herb tea 2 |     |
|          |                                        | RE          | RSD | RE         | RSD | RE         | RSD | RE          | RSD | RE         | RSD | RE         | RSD |
|          |                                        | (%)         | (%) | (%)        | (%) | (%)        | (%) | (%)         | (%) | (%)        | (%) | (%)        | (%) |
| DEP      | 50                                     | 71.3        | 2.7 | 76.4       | 4.8 | 78.8       | 3.4 | 76.7        | 5.5 | 74.2       | 3.8 | 76.1       | 2.7 |
|          | 100                                    | 74.2        | 5.1 | 86.6       | 6.1 | 74.3       | 4.0 | 74.3        | 2.7 | 76.0       | 2.5 | 74.5       | 6.5 |
| DAP      | 50                                     | 84.0        | 7.0 | 89.4       | 5.6 | 87.4       | 5.5 | 82.7        | 2.9 | 83.9       | 7.1 | 86.7       | 4.8 |
|          | 100                                    | 87.4        | 3.8 | 94.5       | 4.1 | 89.5       | 4.0 | 88.3        | 1.6 | 90.2       | 1.6 | 85.6       | 7.5 |
| BBP      | 50                                     | 77.7        | 4.6 | 83.1       | 5.7 | 88.1       | 2.9 | 80.5        | 5.7 | 76.1       | 7.2 | 85.7       | 5.0 |
|          | 100                                    | 78.4        | 5.5 | 82.1       | 6.6 | 78.6       | 3.1 | 86.0        | 2.1 | 83.6       | 5.8 | 77.7       | 3.7 |
| DCHP     | 50                                     | 79.4        | 3.8 | 86.8       | 3.5 | 83.7       | 6.4 | 78.5        | 6.5 | 79         | 5.2 | 78.8       | 5.7 |
|          | 100                                    | 79.2        | 3.0 | 76.5       | 5.7 | 70.2       | 1.3 | 76.3        | 1.9 | 80         | 3.3 | 71.2       | 3.1 |

$[C_{24}H_{52}P]^+BF_4$  m/z: 371.38011

meas. m/z: 371.38037

Hulu #5 RT: 0.02 AV: 1 NL: 5.38E8  
T: FTMS + p ESI Full ms [250.00-450.00]

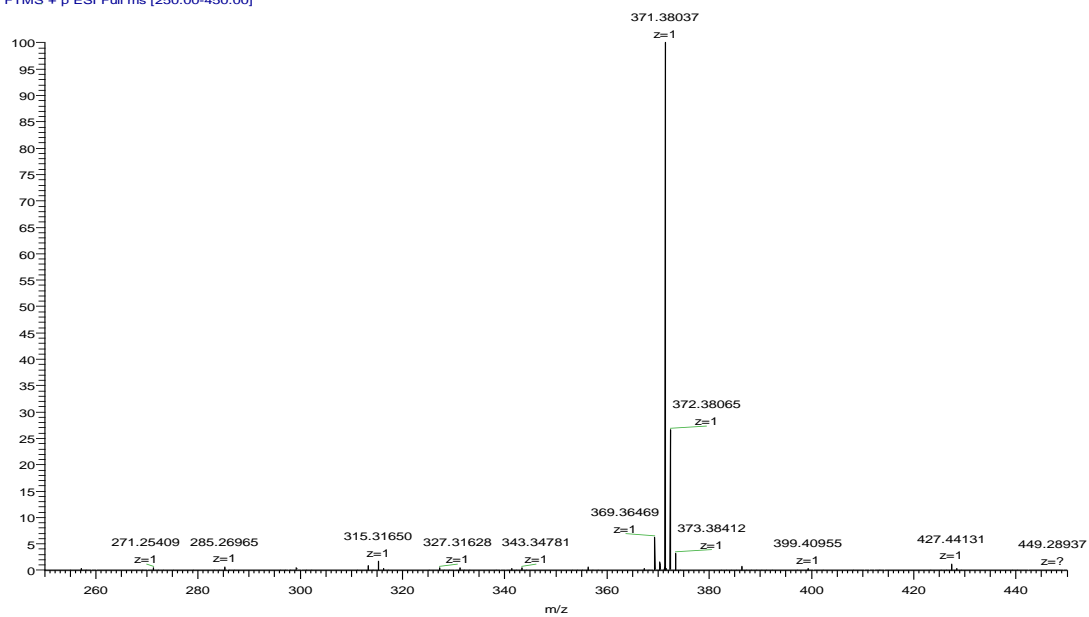

Fig. S1 The mass spectrum of  $[P_{44412}][BF_4]$

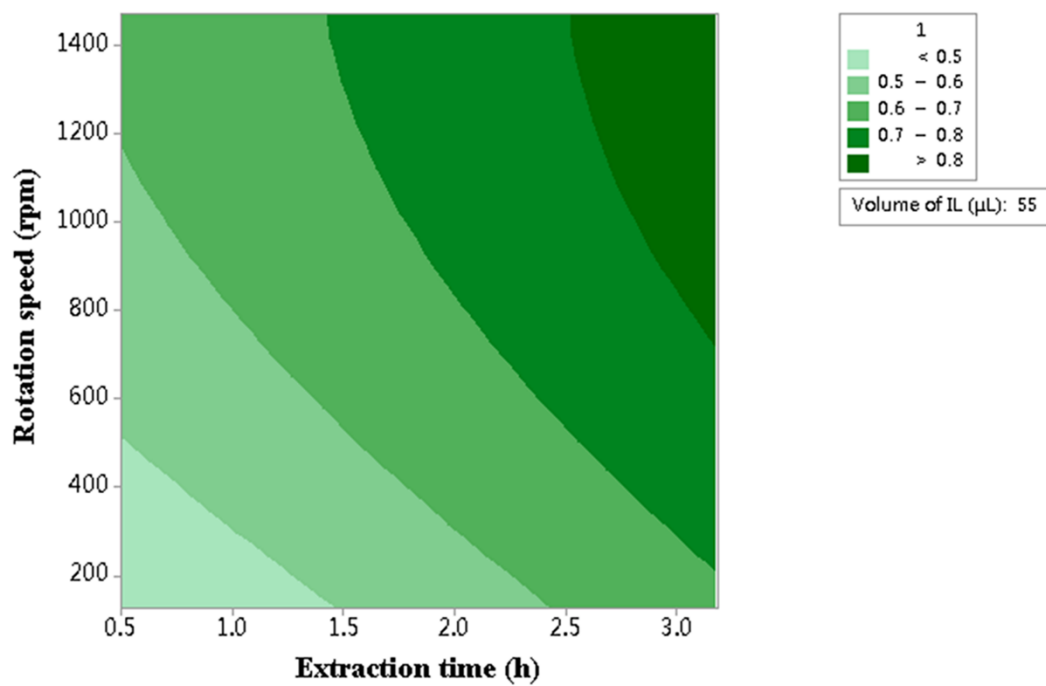

Fig. S2 Contour Plot of Extraction time (h) vs Rotation speed (rpm)
